# Supplementary material for: Tannic Acid–Iron Complex-Based Nanoparticles as a Novel Tool against Oxidative Stress
Source: PubMed Central journal article supplement (PMC9011352; doi:10.1021/acsami.1c24576), 2022-03-30
Supplement: am1c24576_si_001.pdf [file am1c24576_si_001.pdf]

## Supporting information

# Tannic acid – iron complex-based nanoparticles as a novel tool against oxidative stress

*Carlotta Pucci,<sup>\*,‡,1</sup> Chiara Martinelli,<sup>\*,‡,1,†</sup> Daniele De Pasquale,<sup>‡,1</sup> Matteo Battaglini,<sup>1</sup>*

*Nicoletta di Leo,<sup>1,2</sup> Andrea Degl’Innocenti,<sup>1,†</sup> Melike Belenli Gümüş,<sup>1,2</sup> Filippo Drago,<sup>3</sup>*

*Gianni Ciofani<sup>\*,1</sup>*

1 Istituto Italiano di Tecnologia, Smart Bio-Interfaces, Viale Rinaldo Piaggio 34, 56025 Pontedera,

Italy

2 Scuola Superiore Sant’Anna, The Biorobotics Institute, Viale Rinaldo Piaggio 34, 56025

Pontedera, Italy

3 Istituto Italiano di Tecnologia, Electron Microscopy Facility, Via Morego 30, 16163 Genova,

Italy

\*Carlotta Pucci: carlotta.pucci@iit.it; \*Chiara Martinelli: chiara.martinelli@polimi.it, \*Gianni

Ciofani: gianni.ciofani@iit.it

‡These authors contributed equally

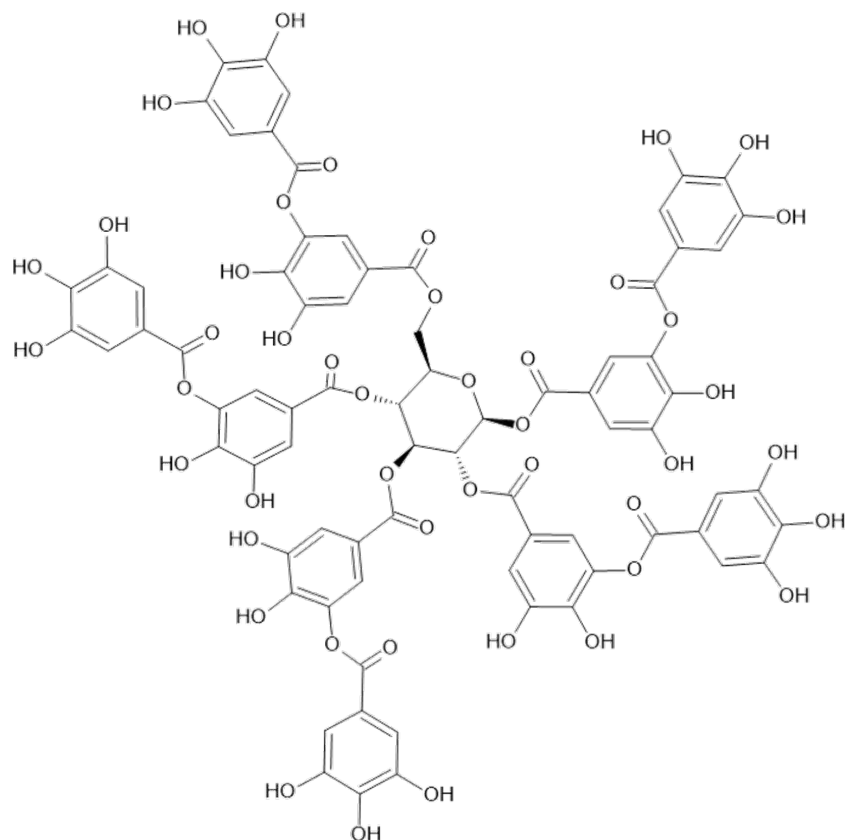

**Figure S1.** Chemical structure of tannic acid.

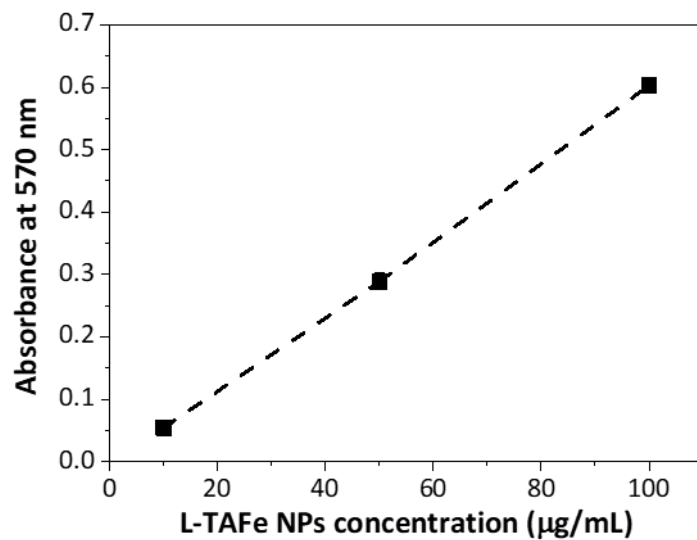

**Figure S2.** Normalized absorbance at 570 nm for different concentrations of L-TAFc NPs obtained in the total antioxidant capacity assay. The three chosen concentrations fall within the linearity range.

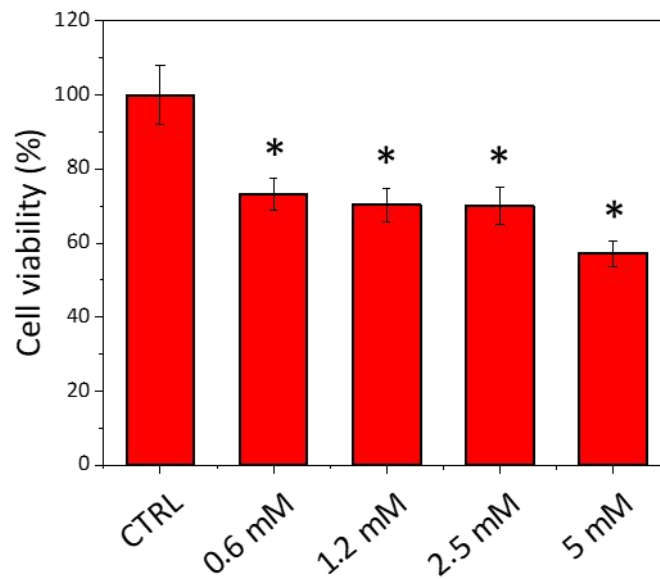

**Figure S3.** Human primary skin fibroblasts viability after treatment with different concentrations of TBH for 1 h. Analyses were normalized to control non-treated cells (CTRL; \*  $p < 0.05$  with respect to CTRL).

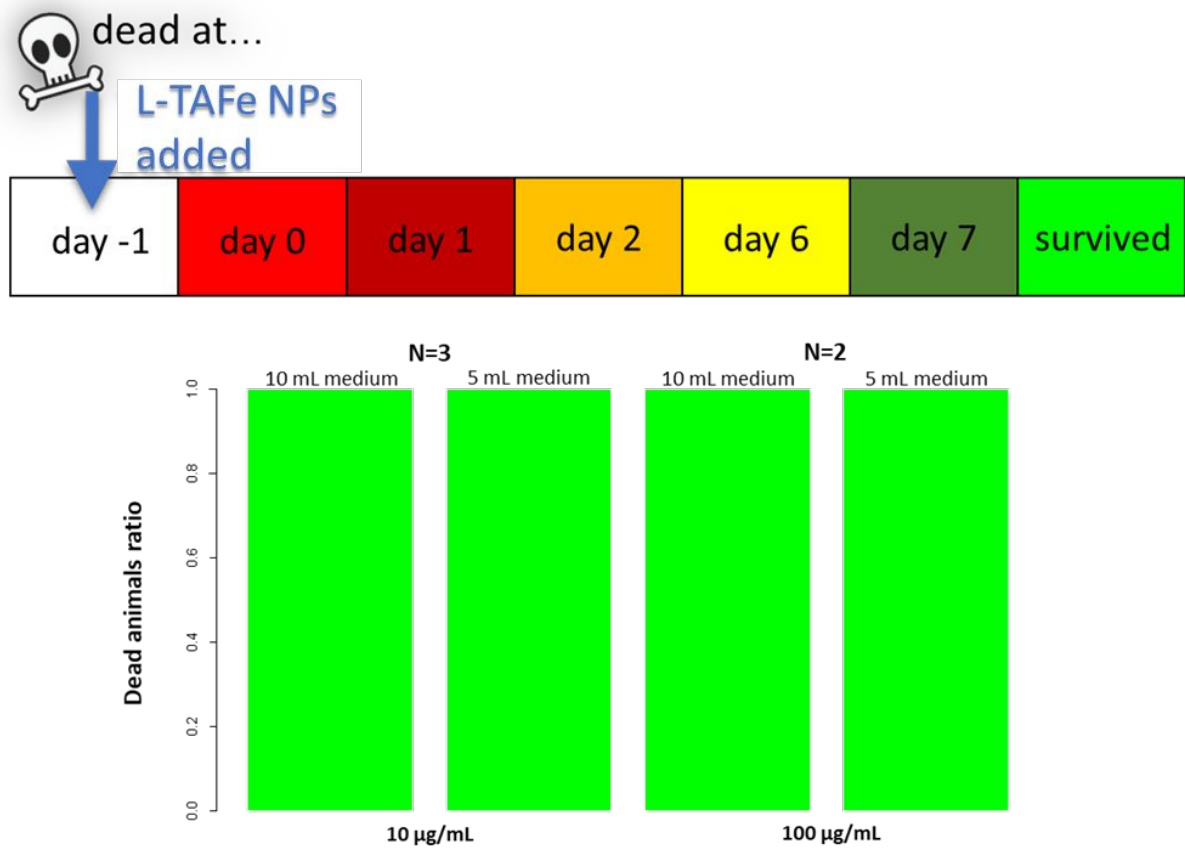

**Figure S4.** *In vivo* biocompatibility results. Planarians survival is 100% after the administration of L-TAFc NPs at both 10 and 100 µg/mL after seven days of incubation.

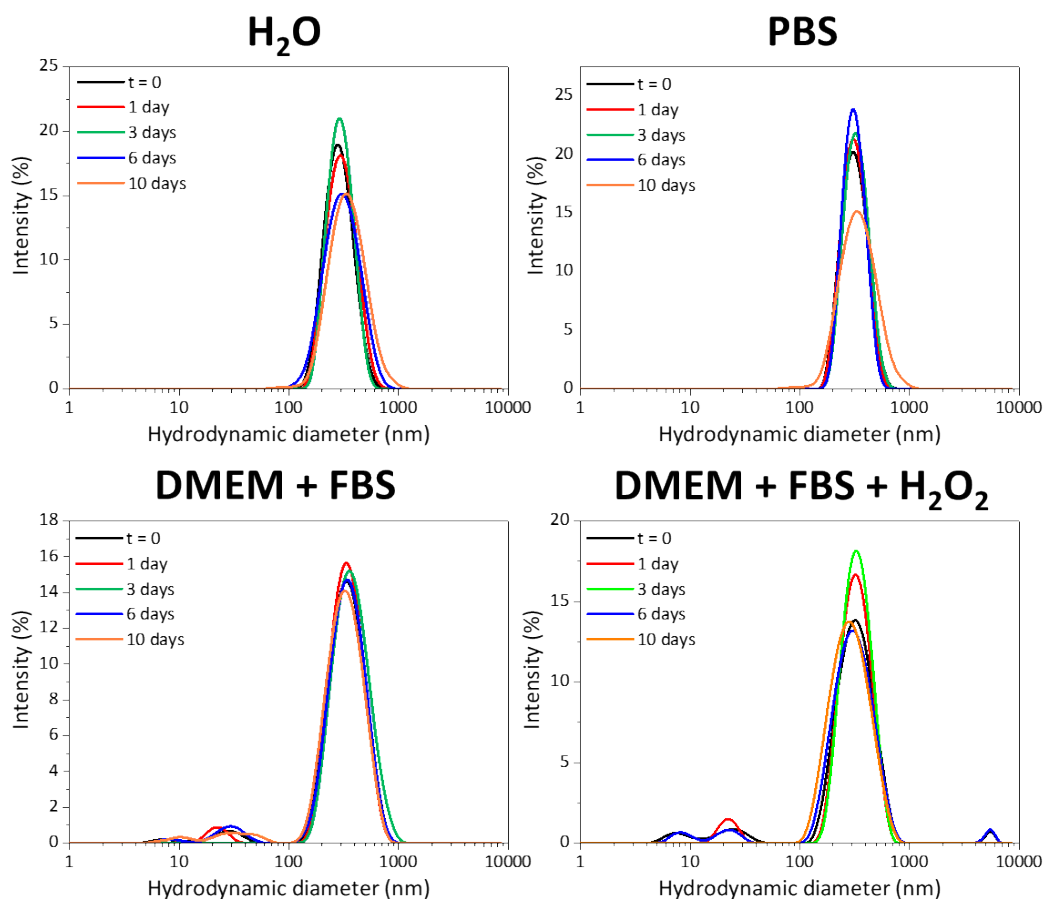

**Figure S5.** Intensity distribution (%) as a function of the hydrodynamic diameter (nm) of L-TAFé NPs in different conditions (H<sub>2</sub>O, PBS, DMEM+FBS 10%, DMEM+FBS+H<sub>2</sub>O<sub>2</sub>) at different time points (0, 1, 3, 6, 10 days).

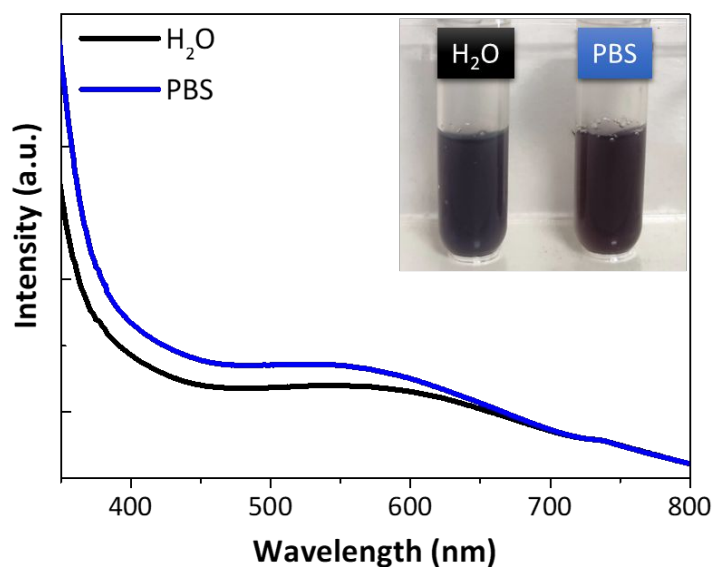

**Figure S6.** UV/Vis spectra of L-TAFé NPs in water (black) and PBS (blue). In the inset, a picture showing the color of L-TAFé NPs in the two different solutions is reported.

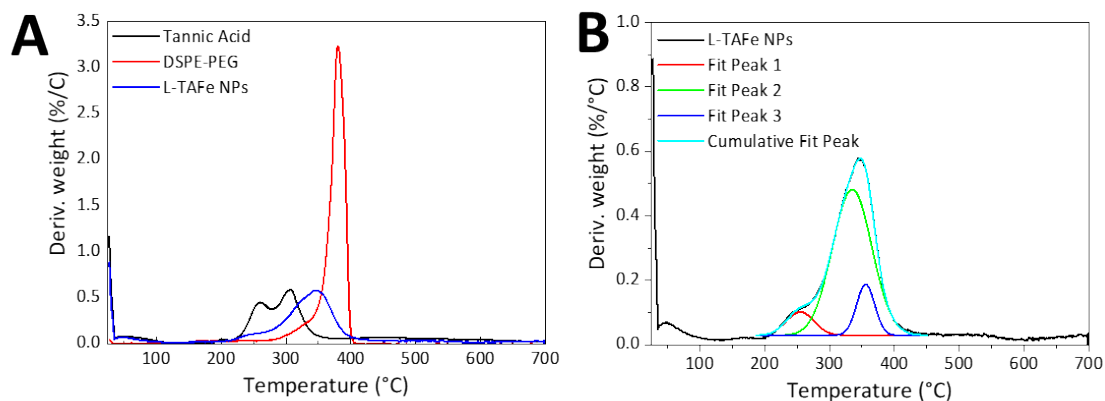

**Figure S7.** (A) Derivative weight (%) of tannic acid, DSPE-PEG, and L-TAFc NPs. (B) Peak deconvolution of the L-TAFc NP thermal event.

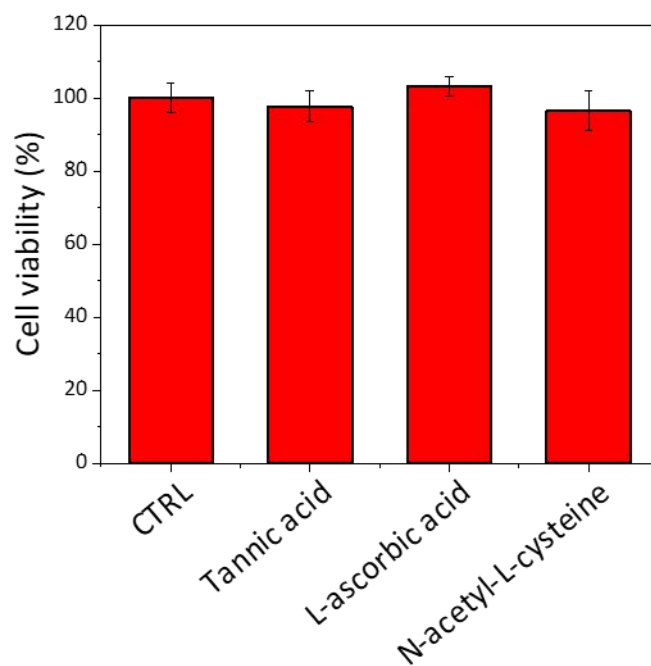

**Figure S8.** Human primary skin fibroblasts viability after treatment with 5 μM of tannic acid, L-ascorbic acid, or and N-acetyl-L-cysteine for 24 h (WST-1 assay). Analyses were normalized to control non-treated cells (CTRL).

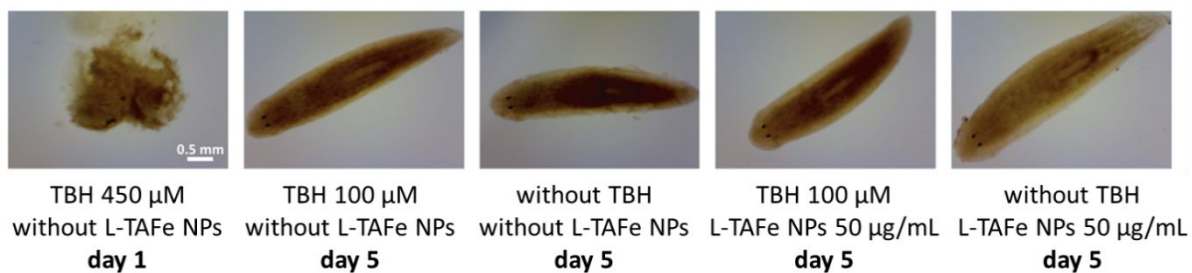

**Figure S9.** Micrographs showing either dead or live planarians (prepared and fixed for imaging), as typically obtained for each of the indicated conditions in terms of TBH concentration, presence/absence of L-TAFc NPs, and time point (in terms of experimental day). In particular, a freshly dead specimen is shown on the left, and four whole planarians are portrayed in the remaining images. All pictures have the same magnification.

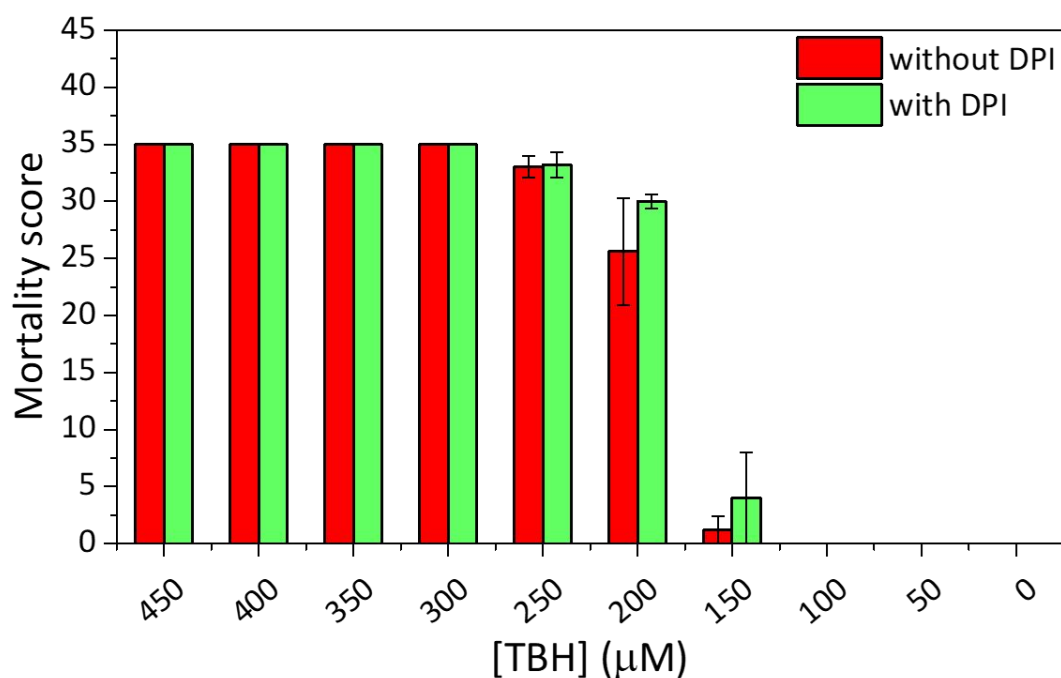

**Figure S10.** *In vivo* toxicology results following DPI (2.5 μM) administration, used as antioxidant positive control. DPI may exert a modest protective activity at low TBH concentrations (150 μM and 200 μM) compared to untreated animals, but such effects are not statistically significant (two-tailed unpaired *t*-test,  $\alpha = 0.05$ ). Plots have been obtained through the assignment of a time-consistent mortality score, starting from 8 for the day of TBH administration down to a score of 1 for day 7 (0 was assigned to survived specimens), followed by averaging scores for each experimental class and computing of standard error.
